# Supplementary material
Source: PubMed Central journal article supplement (PMC10126937)
Supplement: jamainternmed-e230281-s001.pdf [file jamainternmed-e230281-s001.pdf]

## Supplementary Online Content

O'Connor AB, McGarry K, Finn KM, Harris L, Zaas AK. Internal medicine resident perspectives on virtual recruitment. *JAMA Intern Med*. Published online April 24, 2023. doi:10.1001/jamainternmed.2023.0281

### **eAppendix.** Survey Questions Included

This supplementary material has been provided by the authors to give readers additional information about their work.

## **eAppendix.** Survey Questions Included

**1.** To help ACP and AAIM improve future examinations and training programs, please complete this brief questionnaire. Your responses are confidential and will not be linked to your identification number or test score. Your Program Director will not have access to any of the information that is unique to your program. Some data will be used to understand training issues and perspectives and may be shared with the wider community in scholarly publications and presentations. These data will be de-identified as to the responder and the institution.

- I allow my data to be used in this way
- I do not allow my data to be used in this way

**We are interested in your perceptions of the virtual residency recruitment season even if you did not personally participate as an applicant in the 2020-21 recruitment season.**

**12.** Compared to traditional in-person recruitment, how do you think virtual recruitment affected the number of residency programs medical students applied to?

- Many fewer programs
- Fewer programs
- The same number
- More programs
- Many more programs

**13.** Compared to traditional in-person recruitment, how do you think virtual recruitment affected the number of interviews that medical students accepted?

- Many fewer interviews
- Fewer interviews
- The same number
- More interviews
- Many more interviews

**16.** For future residency recruitment seasons, which of the following best reflects your opinion?

- Recruitment should be only in person (if safe due to COVID-19)
- Virtual option should be offered even if in-person is the norm again
- Recruitment should remain virtual with option for subsequent onsite visit
- Recruitment should be only virtual
- Unsure
