# Supplementary material
Source: PubMed Central journal article supplement (PMC10126937)
Supplement: jamainternmed-e230281-s002.pdf [file jamainternmed-e230281-s002.pdf]

## Data Sharing Statement

O'Connor. Internal Medicine Resident Perspectives on Virtual Recruitment. *JAMA Intern Med.*  
Published April 24, 2023. doi:10.1001/jamainternmed.2023.0281

### Data

**Data available:** No

### Additional Information

**Explanation for why data not available:** We only have access to aggregate data, not individual responses, and we've summarized those data in the tables.
